# Supplementary material
Source: publisher figshare collection journal article supplement (https://acs.figshare.com/ndownloader/files/3752665)
Supplement: Supplementary file 1 [file 3752665]

## Supporting information for

# Improved Up-Conversion Luminescence from $\text{Er}^{3+}:\text{LaF}_3$ Nanocrystals Embedded in Oxyfluoride Glass Ceramics via Simultaneous Triwavelength Excitation

Zhi Chen,<sup>†</sup> Guobo Wu,<sup>†</sup> Hong Jia,<sup>‡</sup> Kaniyarakkal Sharafudeen,<sup>§</sup> Wubin Dai,<sup>†</sup>  
Xiaowen Zhang,<sup>†</sup> Shengfeng Zeng,<sup>†</sup> Jianmin Liu,<sup>†</sup> Rongfei Wei,<sup>†</sup> Shichao Lv,<sup>†</sup>  
Guoping Dong<sup>\*,†</sup> and Jianrong Qiu<sup>\*,†</sup>

<sup>†</sup>State Key Laboratory of Luminescent Materials and Devices, and Guangdong Provincial Key Laboratory of Fiber Laser Materials and Applied Techniques, South China University of Technology, Guangzhou 510641, China

<sup>‡</sup>College of Physical and Electronic Information, Luoyang Normal College, Luoyang 471022, Henan, China

<sup>§</sup>Escola de Engenharia de São Carlos, Universidade de São Paulo, São Carlos, São Paulo, 13566-590, Brazil

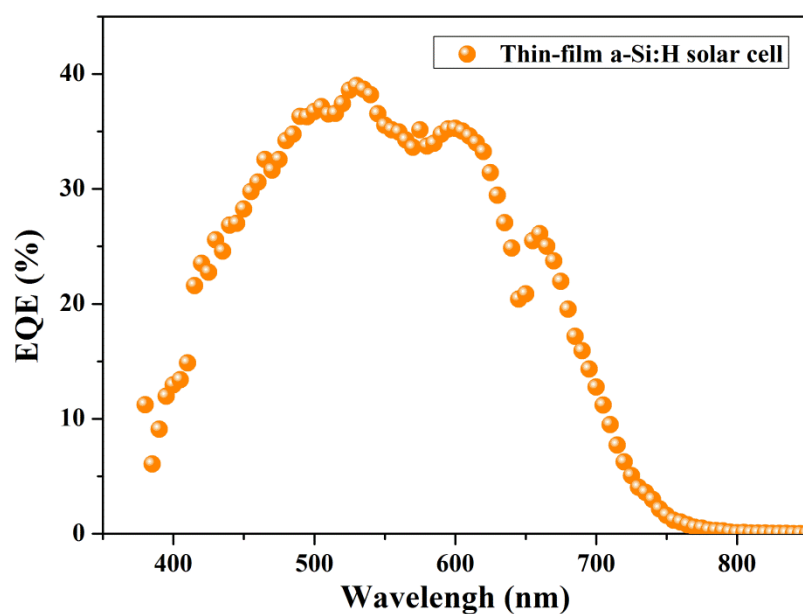

**Figure S1:** The external quantum efficiency (EQE) spectrum of the thin-film a-Si:H solar cell. The spectrum response of the thin-film a-Si:H solar cell is ranging from 380 to 750 nm.

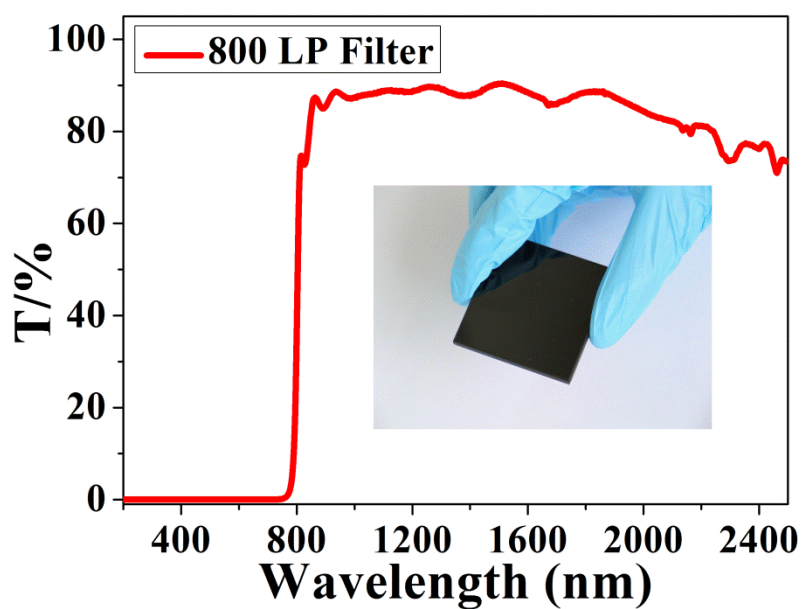

**Figure S2:** Transmission spectrum of an 800 nm long-pass (LP) filter (The inset shows the photograph of the filter).

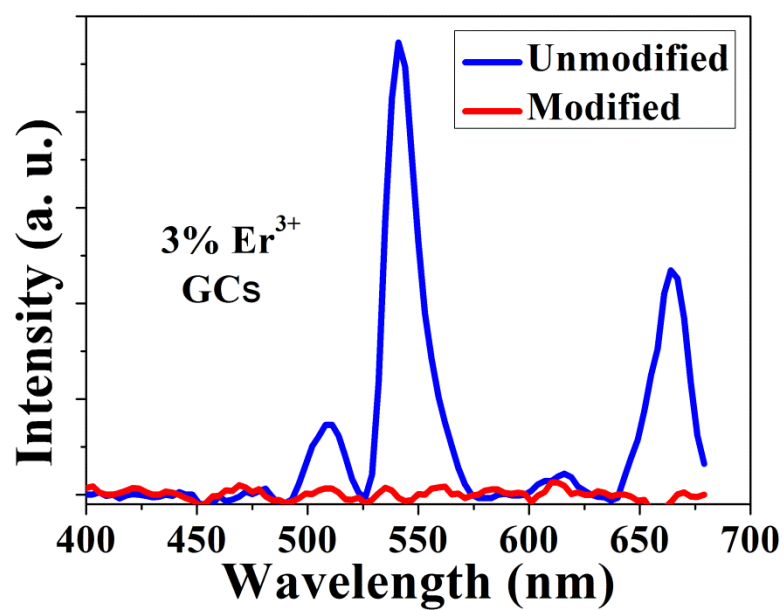

**Figure S3:** UC luminescence spectra of 3%  $\text{Er}^{3+}$ -doped GCs modified with and without thin-film a-Si:H solar cell upon irradiation of concentrated incoherent NIR sunlight with wavelength  $\lambda > 800$  nm.
